# Supplementary figures and images for: Cohesin and condensin extrude DNA loops in a cell cycle-dependent manner
Source: eLife journal article supplement (doi:10.7554/elife.53885), 2020-05-12

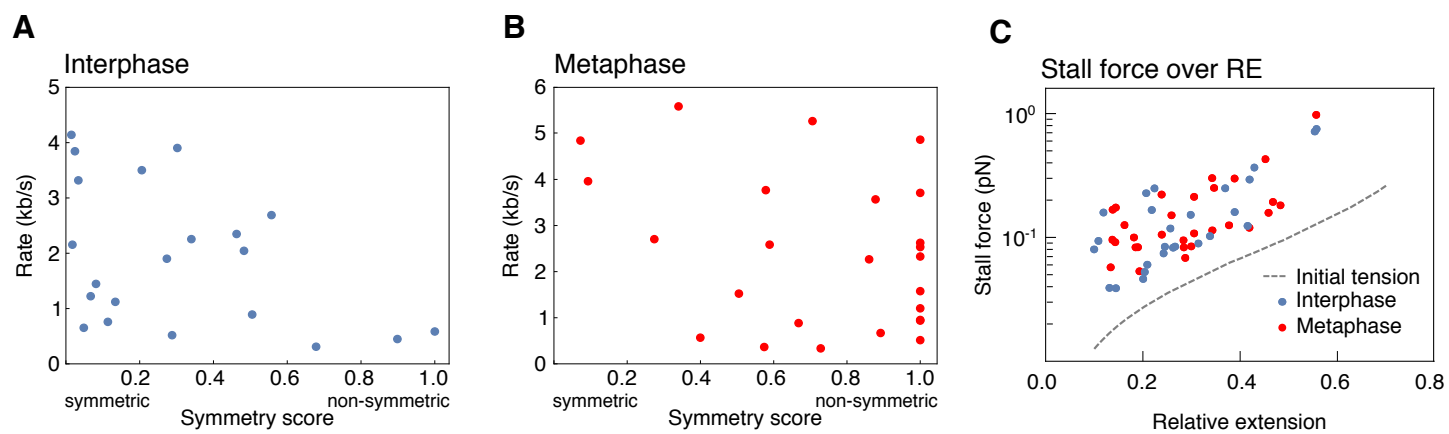

**FIGURE 2 - FIGURE SUPPLEMENT 5** Golfier et al.

Supplement: supp [file elife-53885-supp-v1.zip]

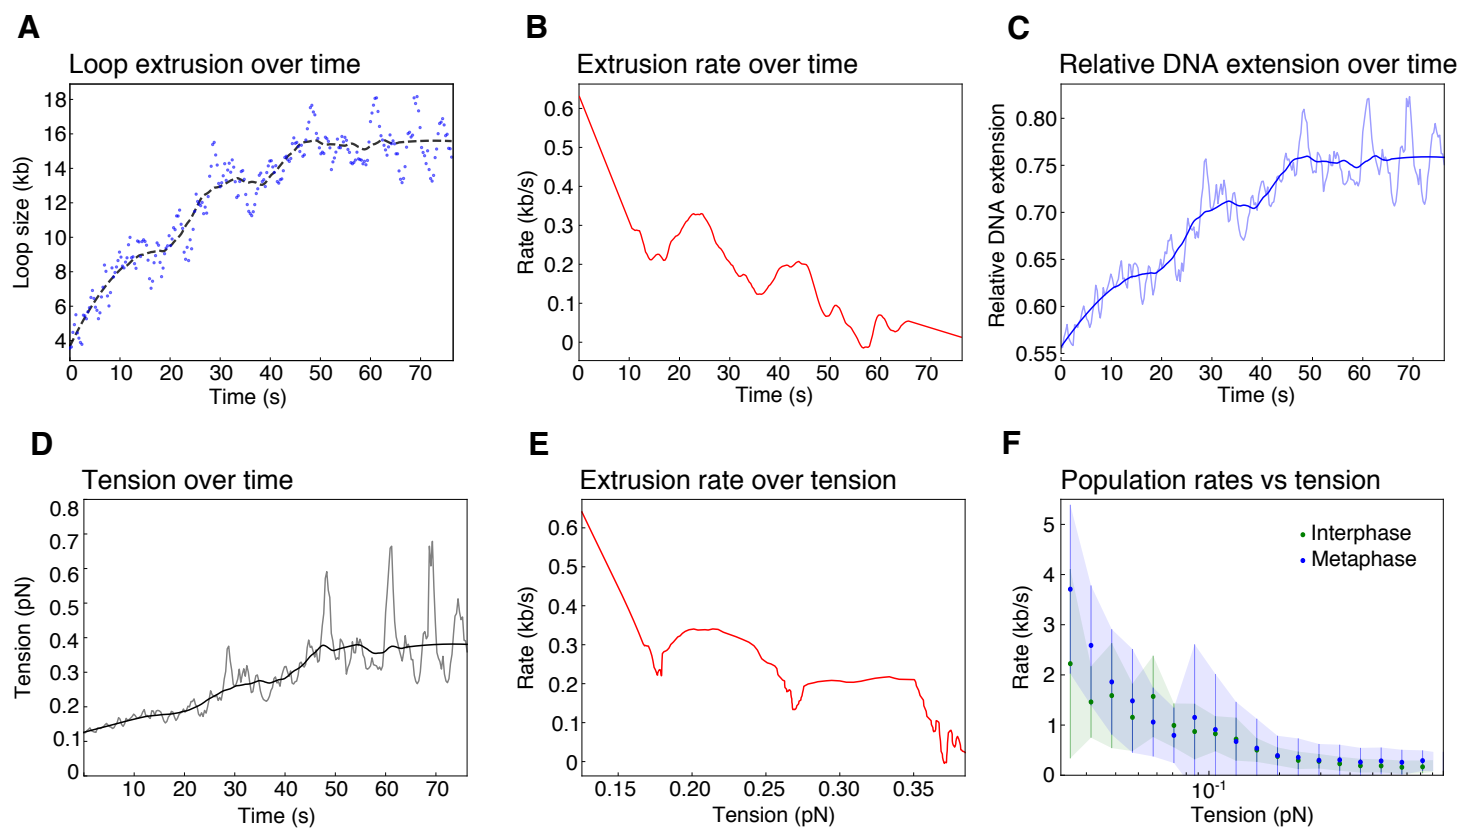

**FIGURE S2 - FIGURE SUPPLEMENT 2**      **Golfier et al.**

Supplement: supp [file elife-53885-supp-v1.zip]

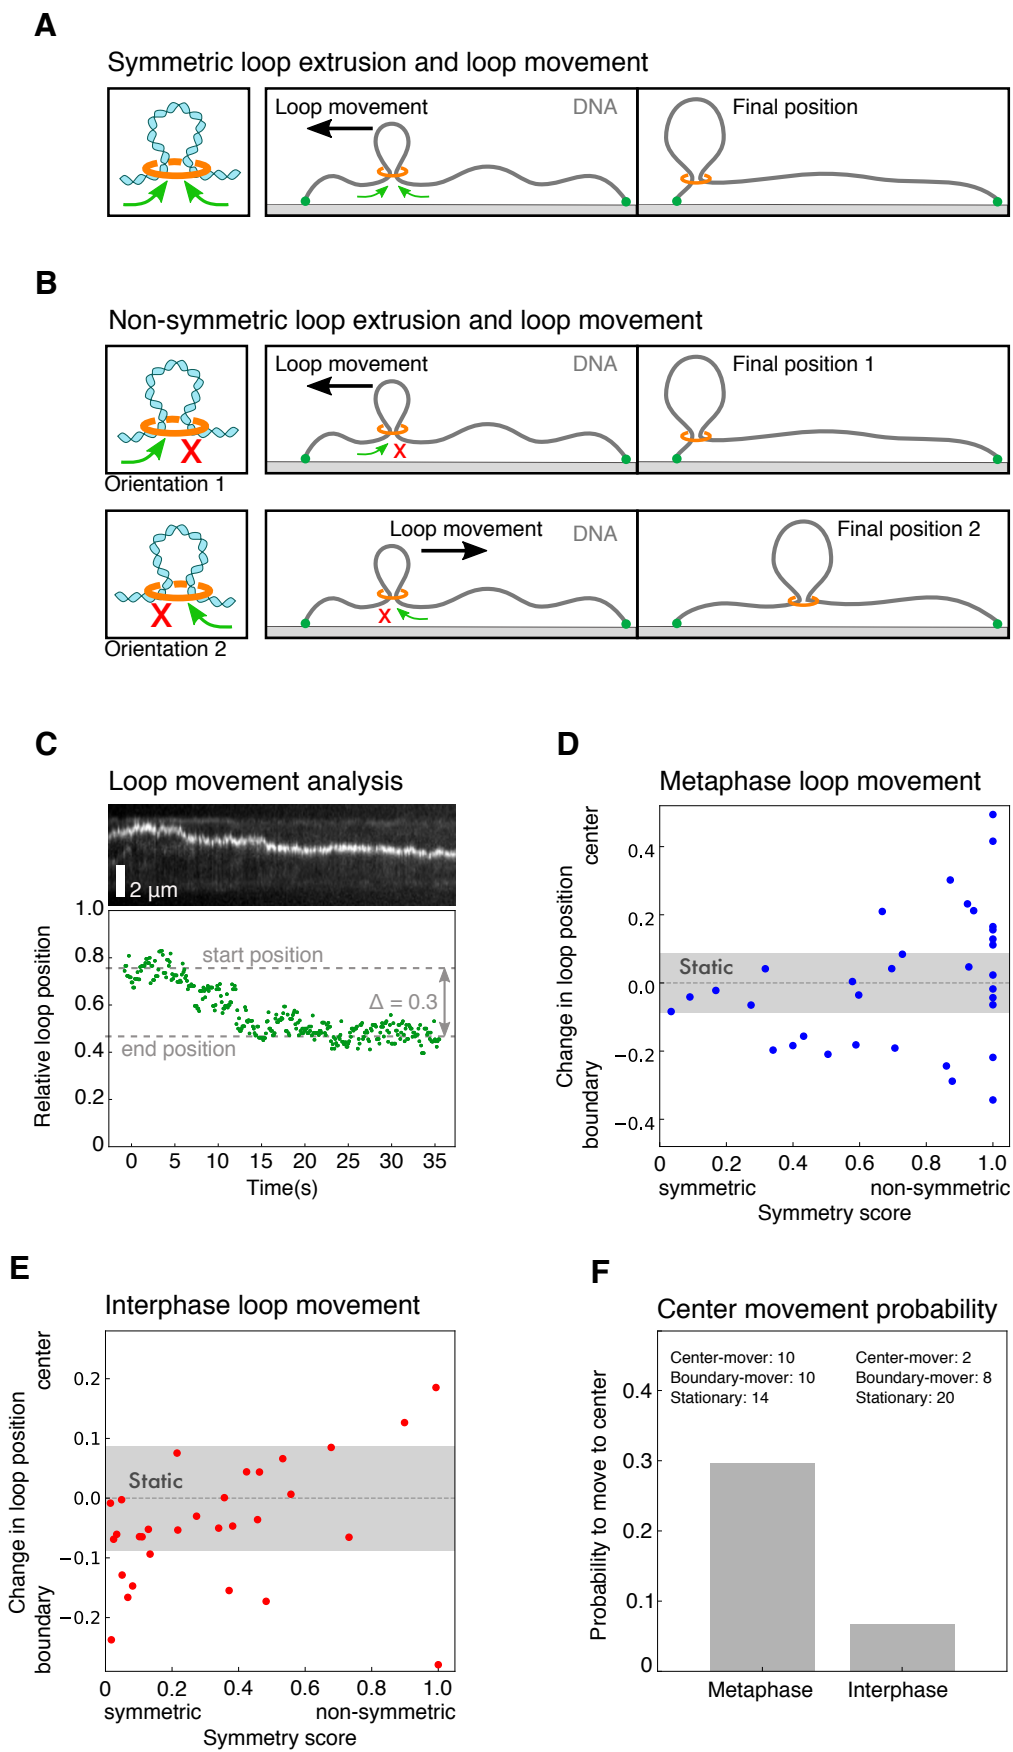

**FIGURE 2 - FIGURE SUPPLEMENT 4** Golfier et al.

Supplement: supp [file elife-53885-supp-v1.zip]

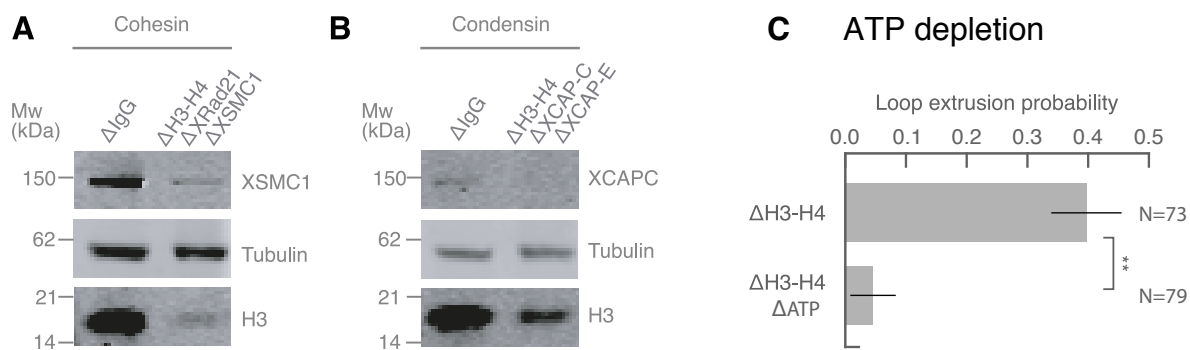

**FIGURE 3 - FIGURE SUPPLEMENT 1** Golfier et al.

Supplement: supp [file elife-53885-supp-v1.zip]

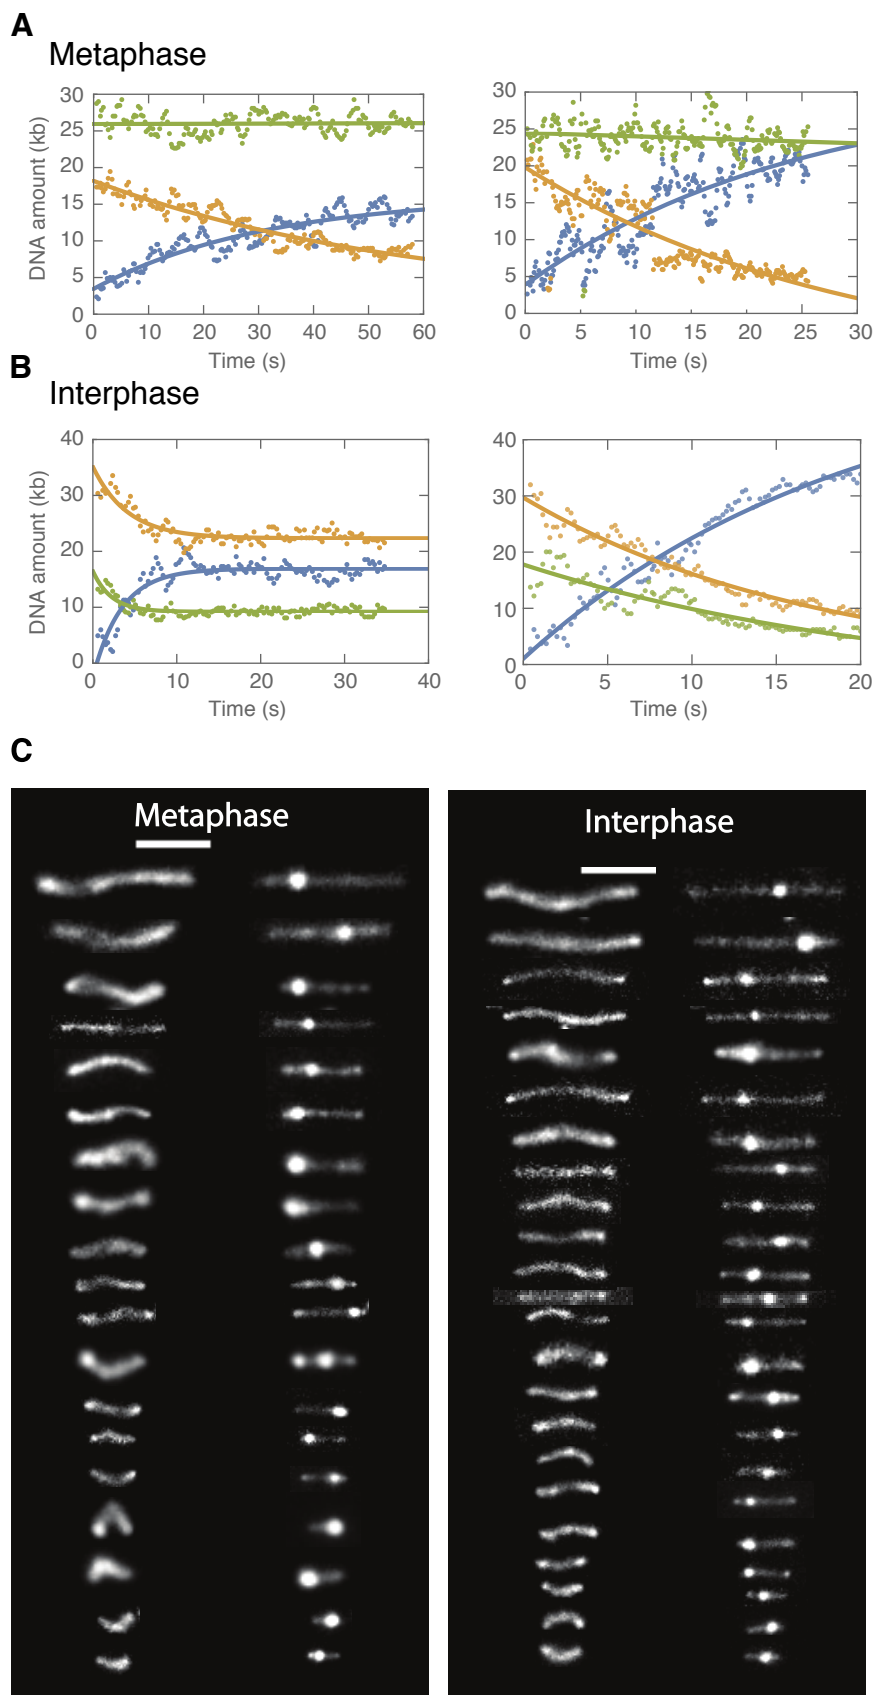

**FIGURE 2 - FIGURE SUPPLEMENT 1** Golfier et al.

Supplement: supp [file elife-53885-supp-v1.zip]

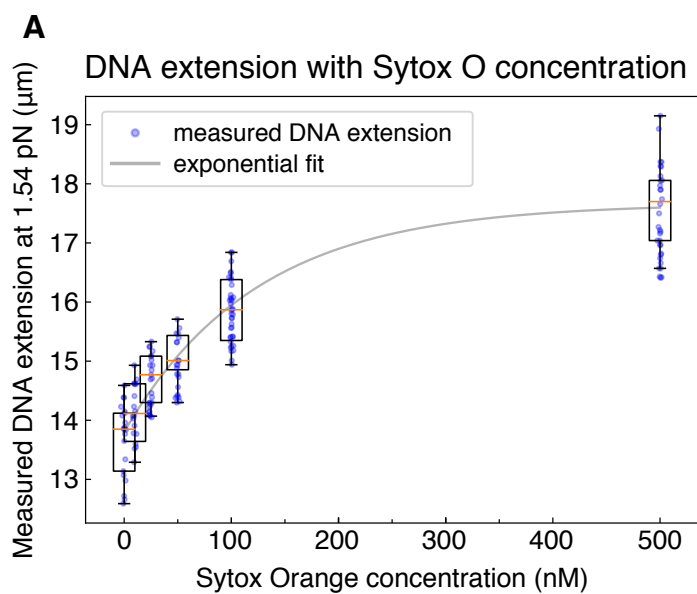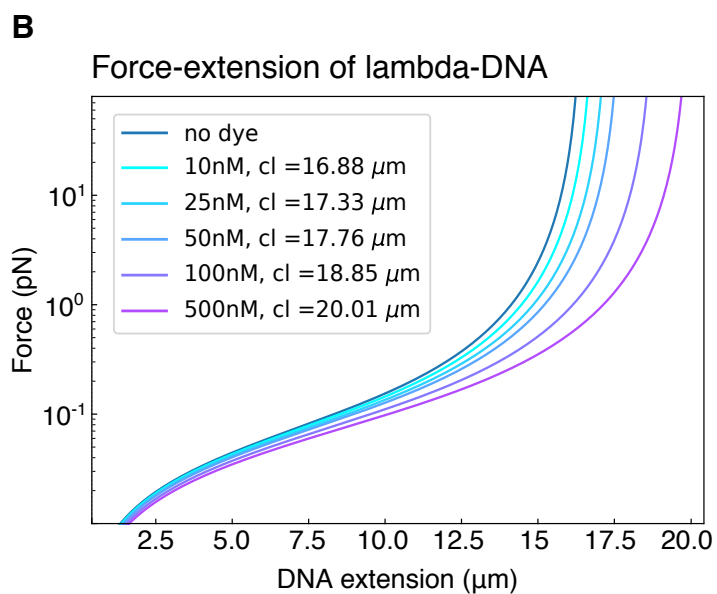

FIGURE 2 - FIGURE SUPPLEMENT 6 Golfier et al.

Supplement: supp [file elife-53885-supp-v1.zip]

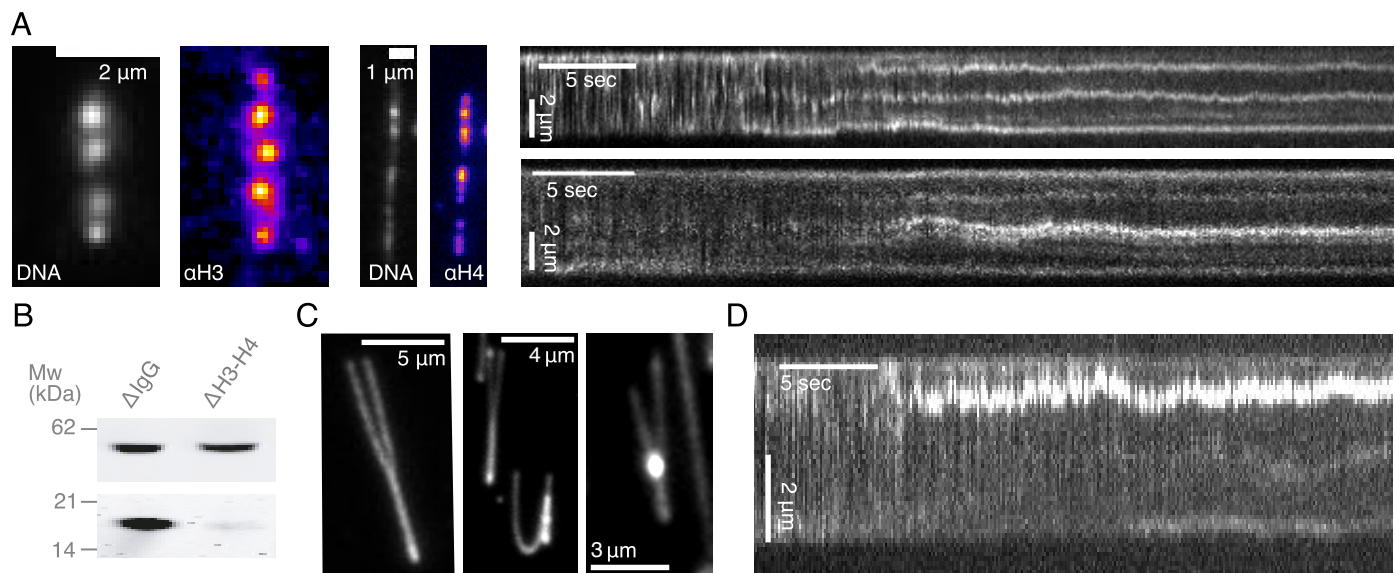

**FIGURE 1 - FIGURE SUPPLEMENT 1**      **Golfier et al.**

Supplement: supp [file elife-53885-supp-v1.zip]

**A****Metaphase**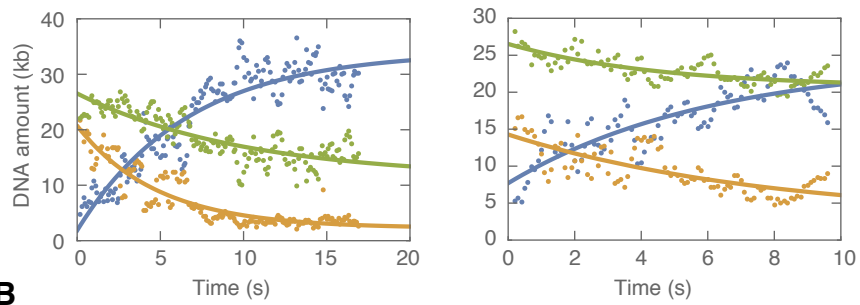**B****Interphase**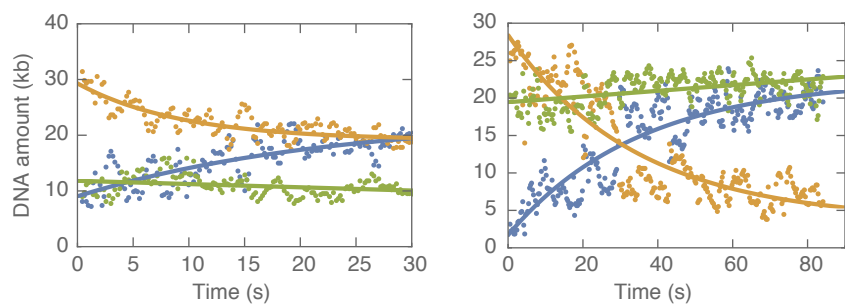**FIGURE 2 - FIGURE SUPPLEMENT 3** Golfier et al.

Supplement: supp [file elife-53885-supp-v1.zip]
